# Supplementary material
Source: Springer Nature journal article supplement (https://www.springermedizin.de/resource/supplementary/12943_2013_1294_MOESM1_ESM.pdf/9553234)

# Supplementary Figure 1

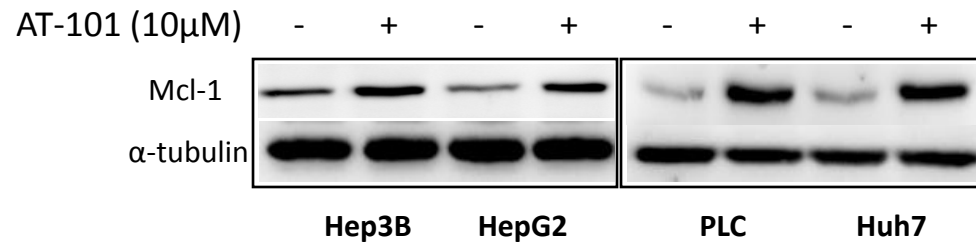

# Supplementary Figure 2

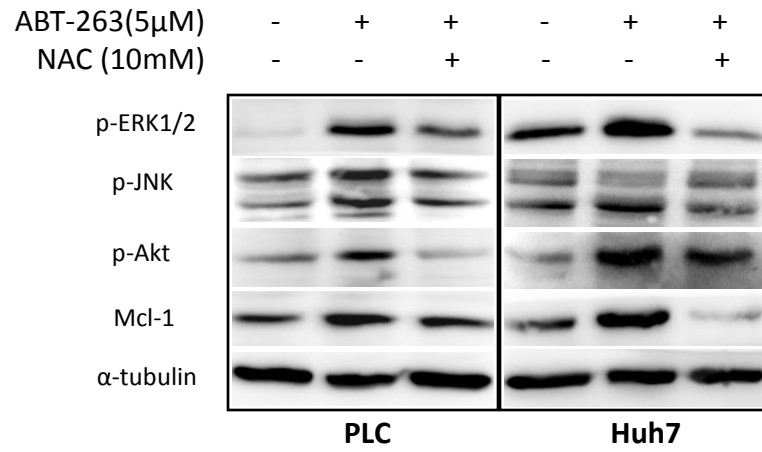

Supplement: MOESM1 [file 9553234]
